# Supplementary material for: Effects of Polymer Blending on the Performance of a Subcutaneous Biodegradable Implant for HIV Pre-Exposure Prophylaxis (PrEP)
Source: MDPI journal article supplement (doi:10.3390/ijms22126529), 2021-06-18
Supplement: s1 [file s1]

# Supplementary Materials: Effects of Polymer Blending on the Performance of a Subcutaneous Biodegradable Implant for HIV Pre-Exposure Prophylaxis (PrEP)

Linying Li <sup>1</sup>, Christine Areson <sup>1</sup>, Ariane van der Straten <sup>2,3</sup>, and Leah M. Johnson <sup>1\*</sup>

<sup>1</sup> Engineered Systems RTI International, 3040 E. Cornwallis Road, Durham, North Carolina 27709, USA; ali@rti.org (L.L.); careson@rti.org (C.A.)

<sup>2</sup> Center for AIDS Prevention Studies, Dept Department of Medicine, University of California San Francisco, San Francisco, California, 94104, USA; arianevds@gmail.com

<sup>3</sup> ASTRA consulting, Kensington, California CA 94708, USA

\* Correspondence: leahjohnson@rti.org; Tel.: +1-919-541-7233

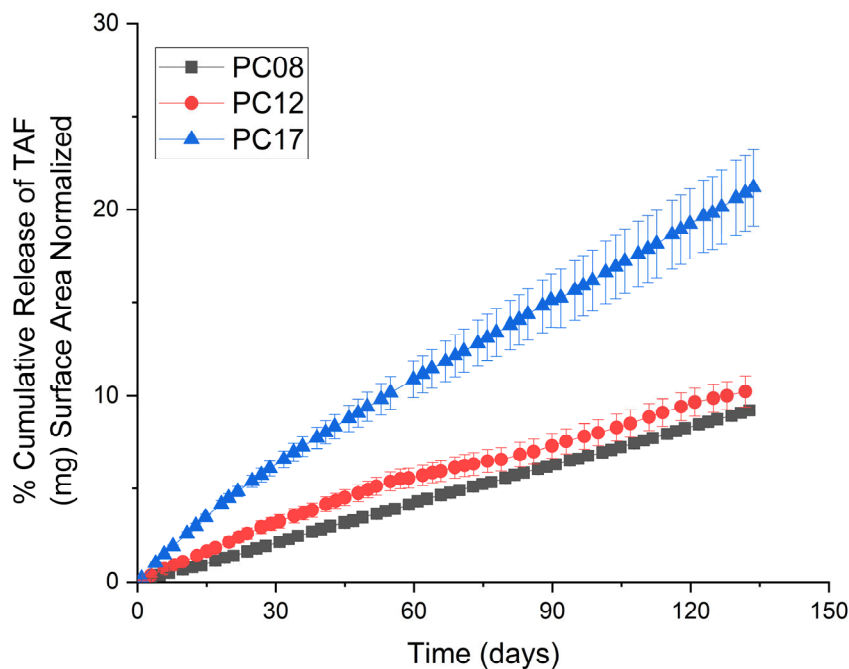

**Figure S1.** Percentage Cumulative release profiles of TAF from implants comprising extruded tubes of PC-08, PC-12, and PC-17. All implants contain a formulation of 2:1 TAF/ sesame oil and tubes with a wall thickness of 100  $\mu\text{m}$ , a length of 40 mm, and an OD of 2.5 mm. All samples were performed in triplicate.

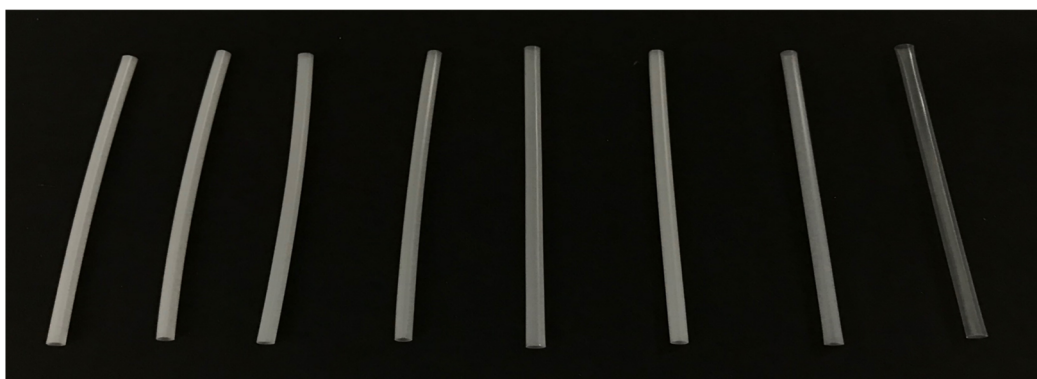

**PC08 25/75 50/50 75/25 PC12 25/75 50/50 75/25 PC17**

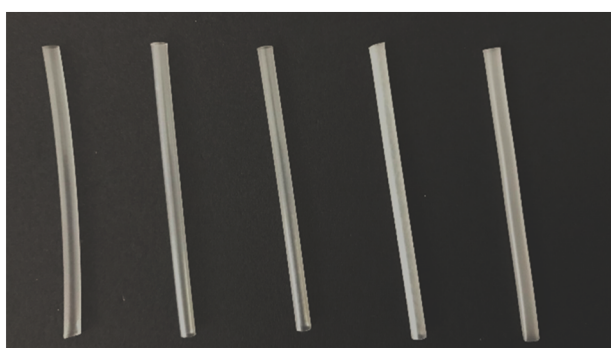

**PC-17 25/75 50/50 75/25 PC-12**

**Figure S2.** Digital camera image of extruded tubes comprising pure PCL formulations and blends.

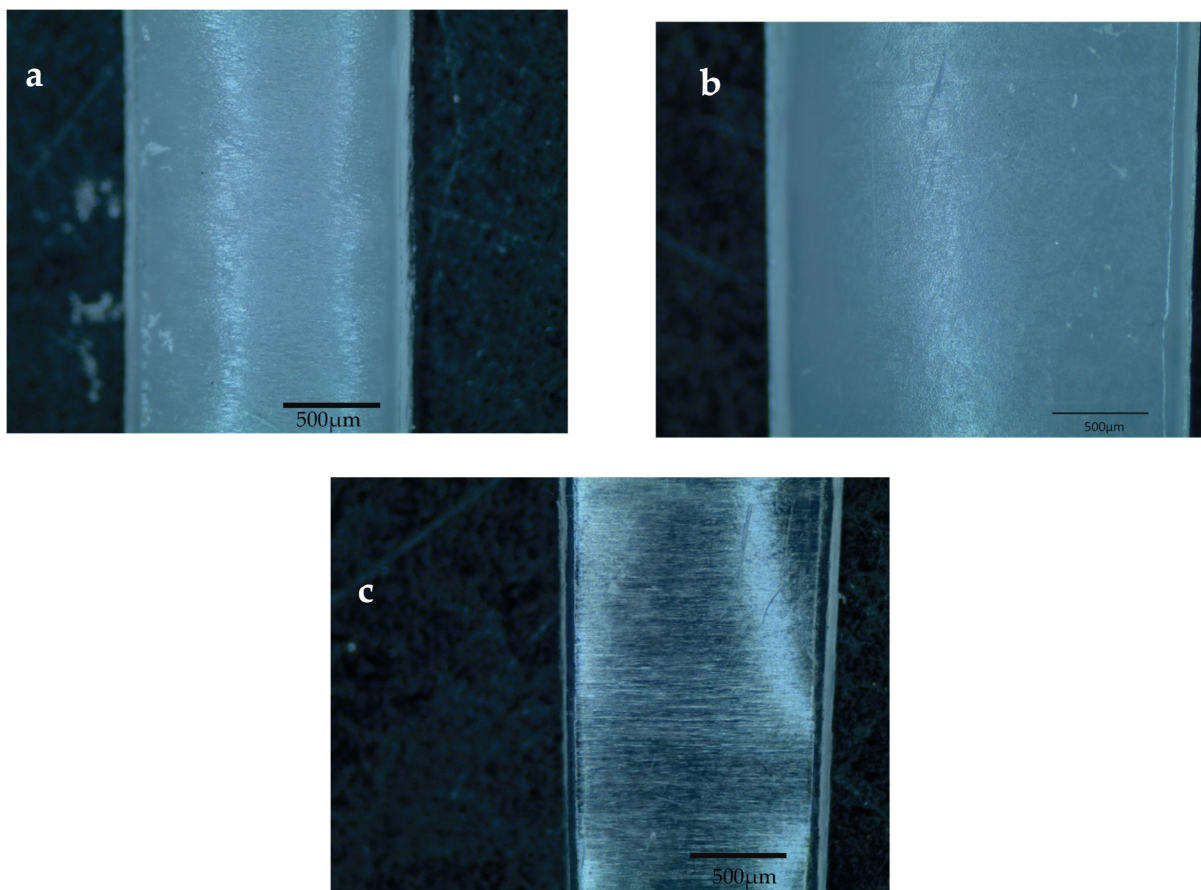

**Figure S3.** The microscope images of the varying 100  $\mu\text{m}$  PCL tubes: (a) PC-08 100  $\mu\text{m}$ , (b) PC-12 100  $\mu\text{m}$ , and (c) PC-17 100  $\mu\text{m}$ . The extruded tubes were sliced open and flattened to adhere to glass slides. The magnification of the microscope is set at 4.5 times.

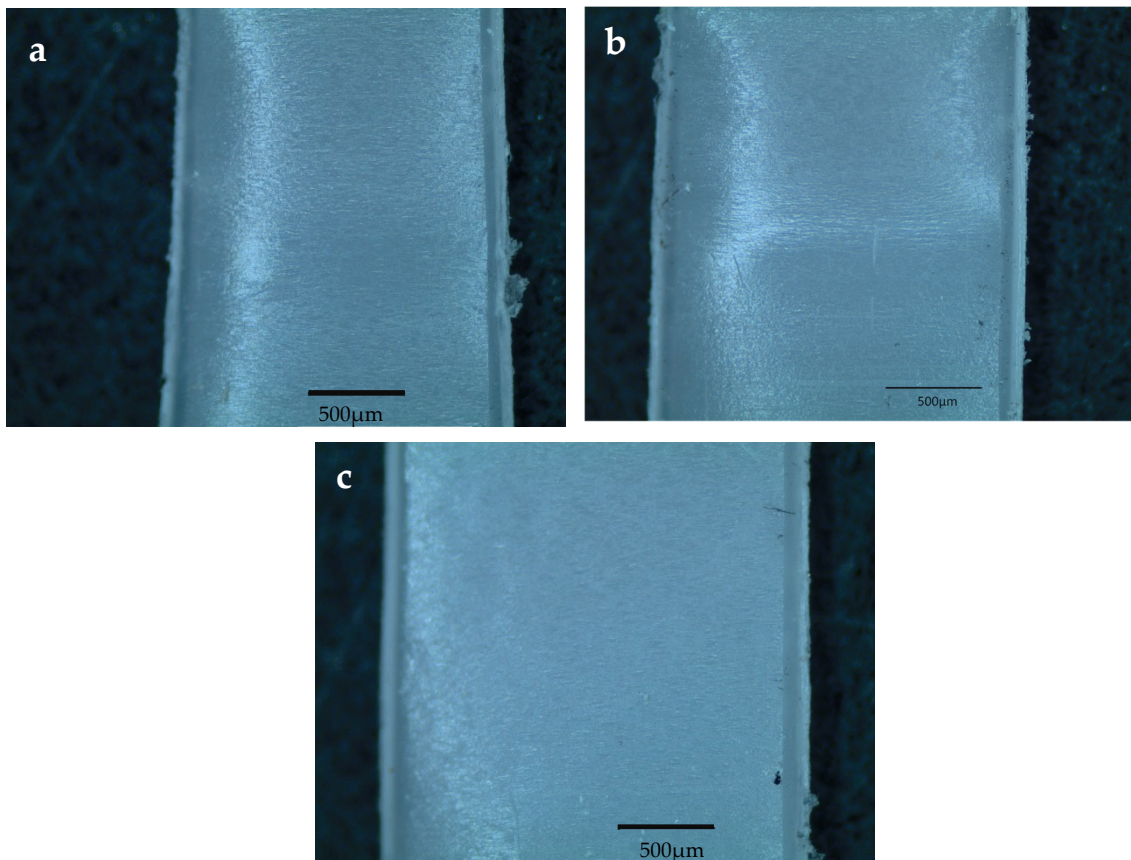

**Figure S4.** The microscope images of the binary PC-08/PC-12 blends: (a) PC-08/ PC-12 25/75, (b) PC-08/ PC-12 50/50, and (c) PC-08/ PC-12 75/25. The wall thickness of the extruded tubes comprising these blends is 100  $\mu\text{m}$ . The extruded tubes were sliced open and flattened to adhere to glass slides. The magnification of the microscope is set at 4.5 times.

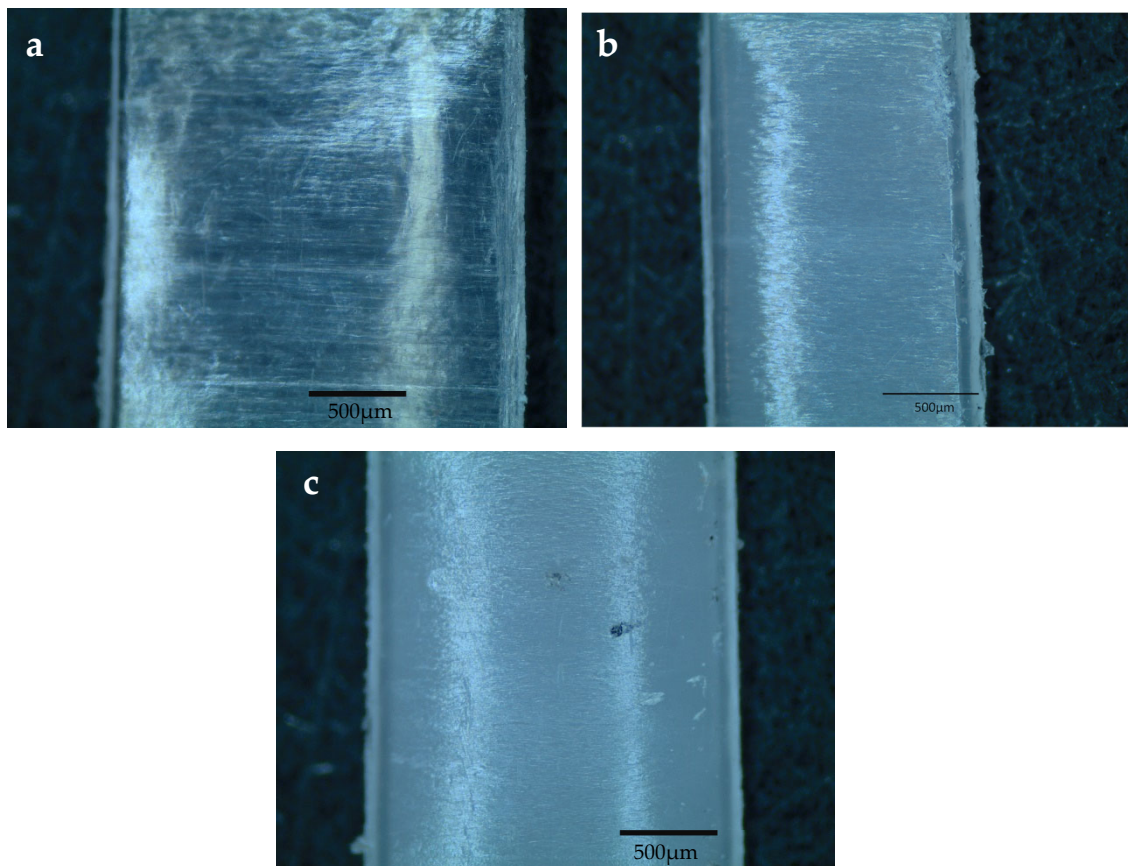

**Figure S5.** The microscope images of the binary PC-08/PC-17 blends: (a) PC-08/ PC-17 25/75, (b) PC-08/ PC-17 50/50, and (c) PC-08/ PC-17 75/25. The wall thickness of the extruded tubes comprising these blends is 100  $\mu\text{m}$ . The extruded tubes were sliced open and flattened to adhere to glass slides. The magnification of the microscope is set at 4.5 times.



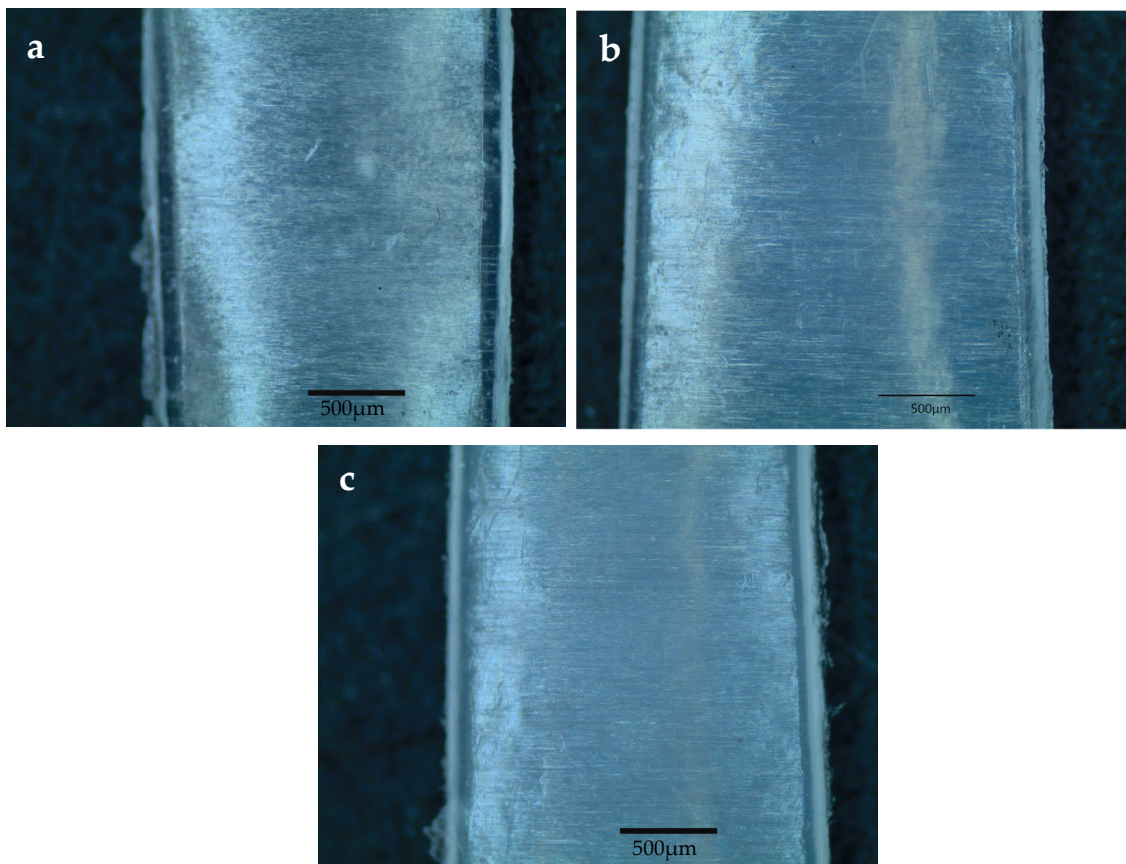

**Figure S6.** The microscope images of the binary PC-12/PC-17 blends: (a) PC-12/ PC-17 25/75, (b) PC-12/ PC-17 50/50, and (c) PC-12/ PC-17 75/25. The wall thickness of the extruded tubes comprising these blends is 100  $\mu\text{m}$ . The extruded tubes were sliced open and flattened to adhere to glass slides. The magnification of the microscope is set at 4.5 times.

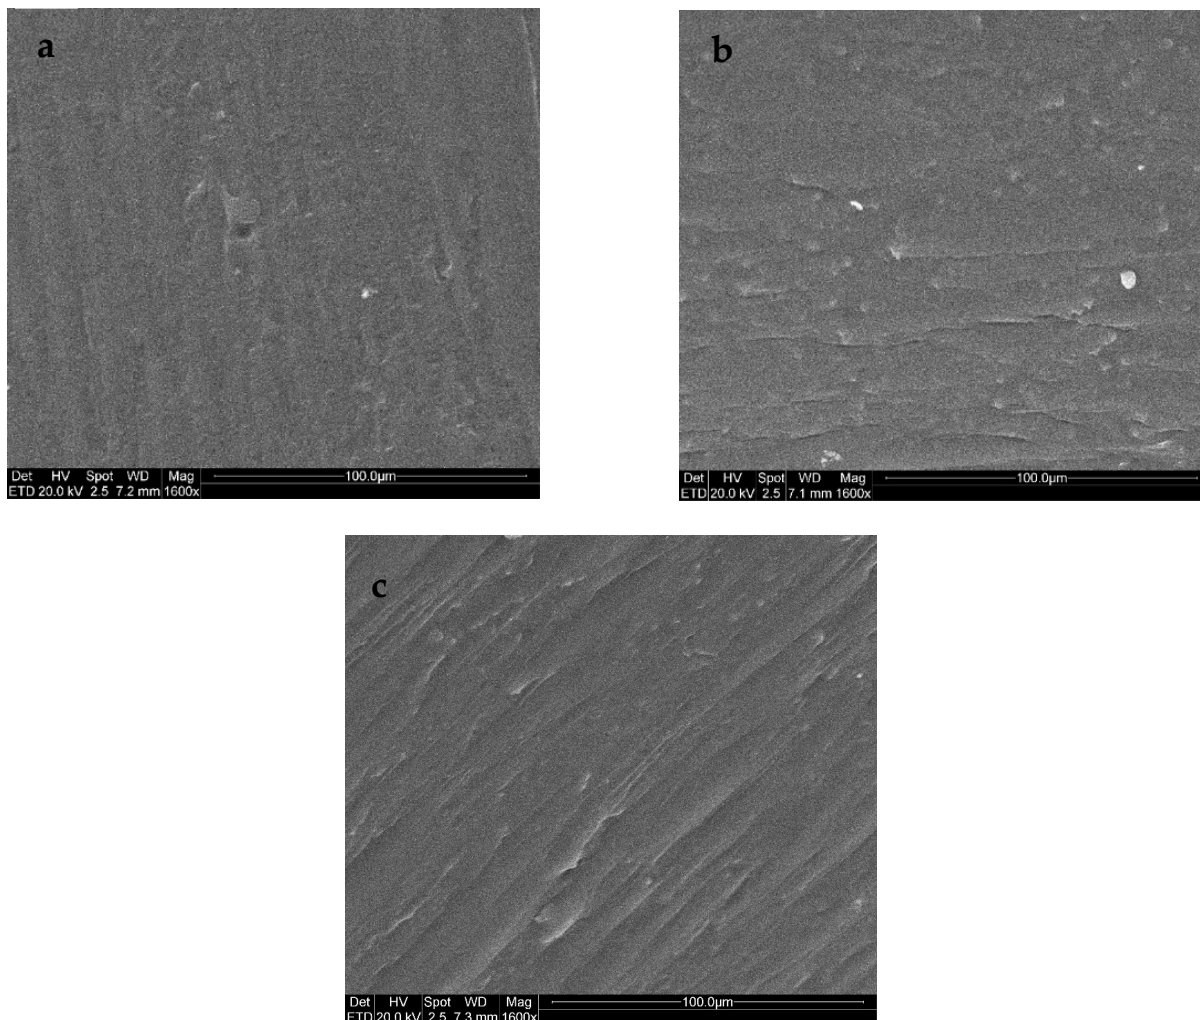

**Figure S7.** The SEM images of the binary PC-08/PC-12 blends: (a) PC-08/ PC-12 25/75, (b) PC-08/ PC-12 50/50, and (c) PC-08/ PC-12 75/25. The wall thickness of the extruded tubes comprising these blends is 100  $\mu\text{m}$ . Samples were prepared for imaging by slicing the extruded tubes and flattened them onto a carbon adhesive substrate. The SEM images were taken at a voltage of 20 kV and a spot size of 2.5 under high vacuum at magnification of 1600K.

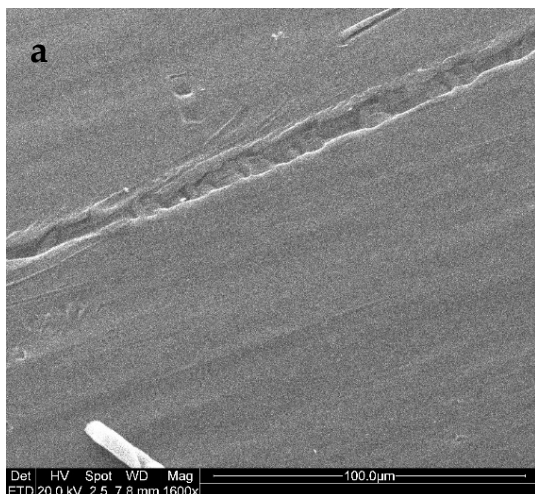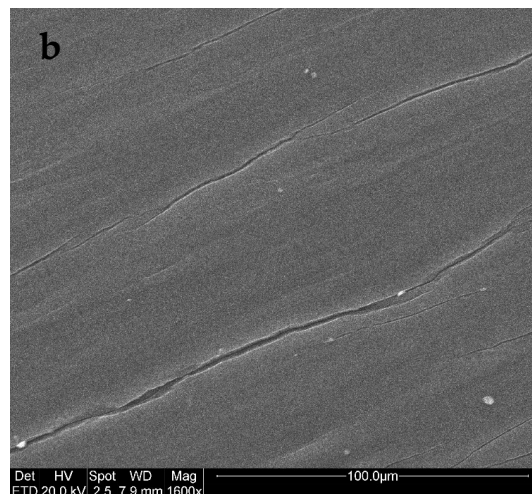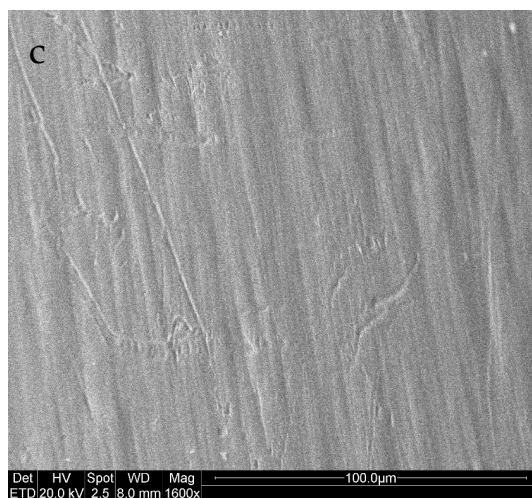

**Figure S8.** The SEM images of the binary PC-08/PC-17 blends: (a) PC-08/ PC-17 25/75, (b) PC-08/ PC-17 50/50, and (c) PC-08/ PC-17 75/25. The wall thickness of the extruded tubes comprising these blends is 100  $\mu\text{m}$ . Samples were prepared for imaging by slicing the extruded tubes and flattened them onto a carbon adhesive substrate. The SEM images were taken at a voltage of 20 kV and a spot size of 2.5 under high vacuum at magnification of 1600K.



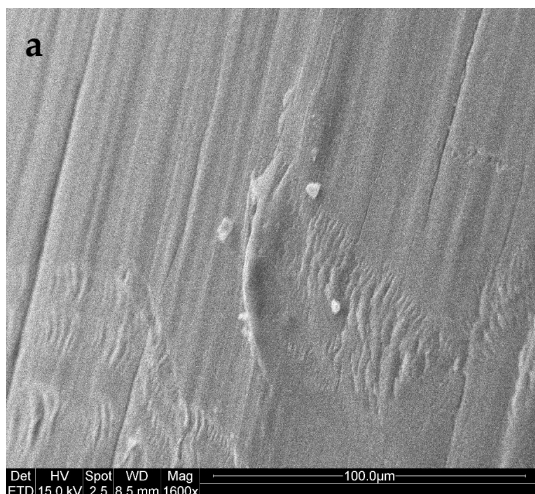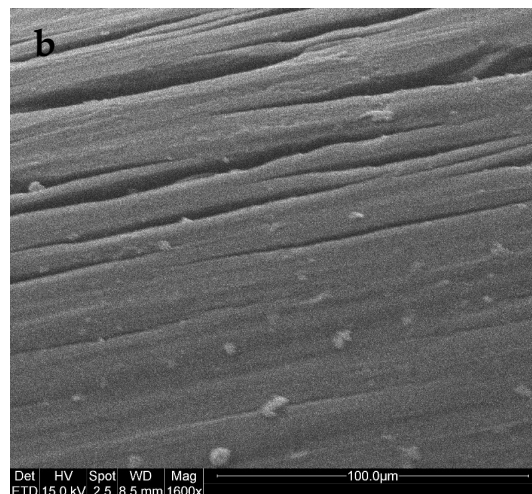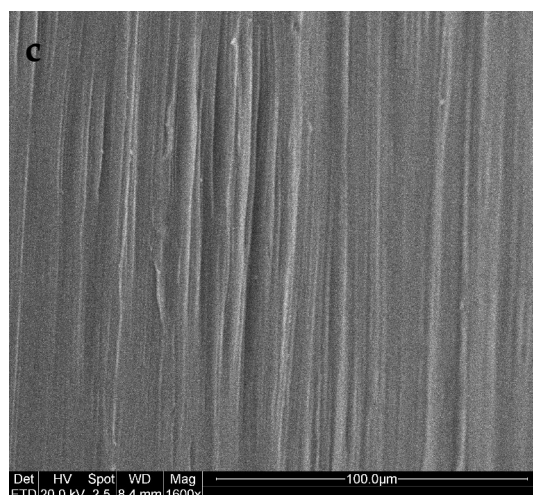

**Figure S9.** The SEM images of the binary PC-12/PC-17 blends: (a) PC-12/ PC-17 25/75, (b) PC-12/ PC-17 50/50, and (c) PC-12/ PC-17 75/25. The wall thickness of the extruded tubes comprising these blends is 100  $\mu\text{m}$ . Samples were prepared for imaging by slicing the extruded tubes and flattened them onto a carbon adhesive substrate. The SEM images were taken at a voltage of 20 kV and a spot size of 2.5 under high vacuum at magnification of 1600K.

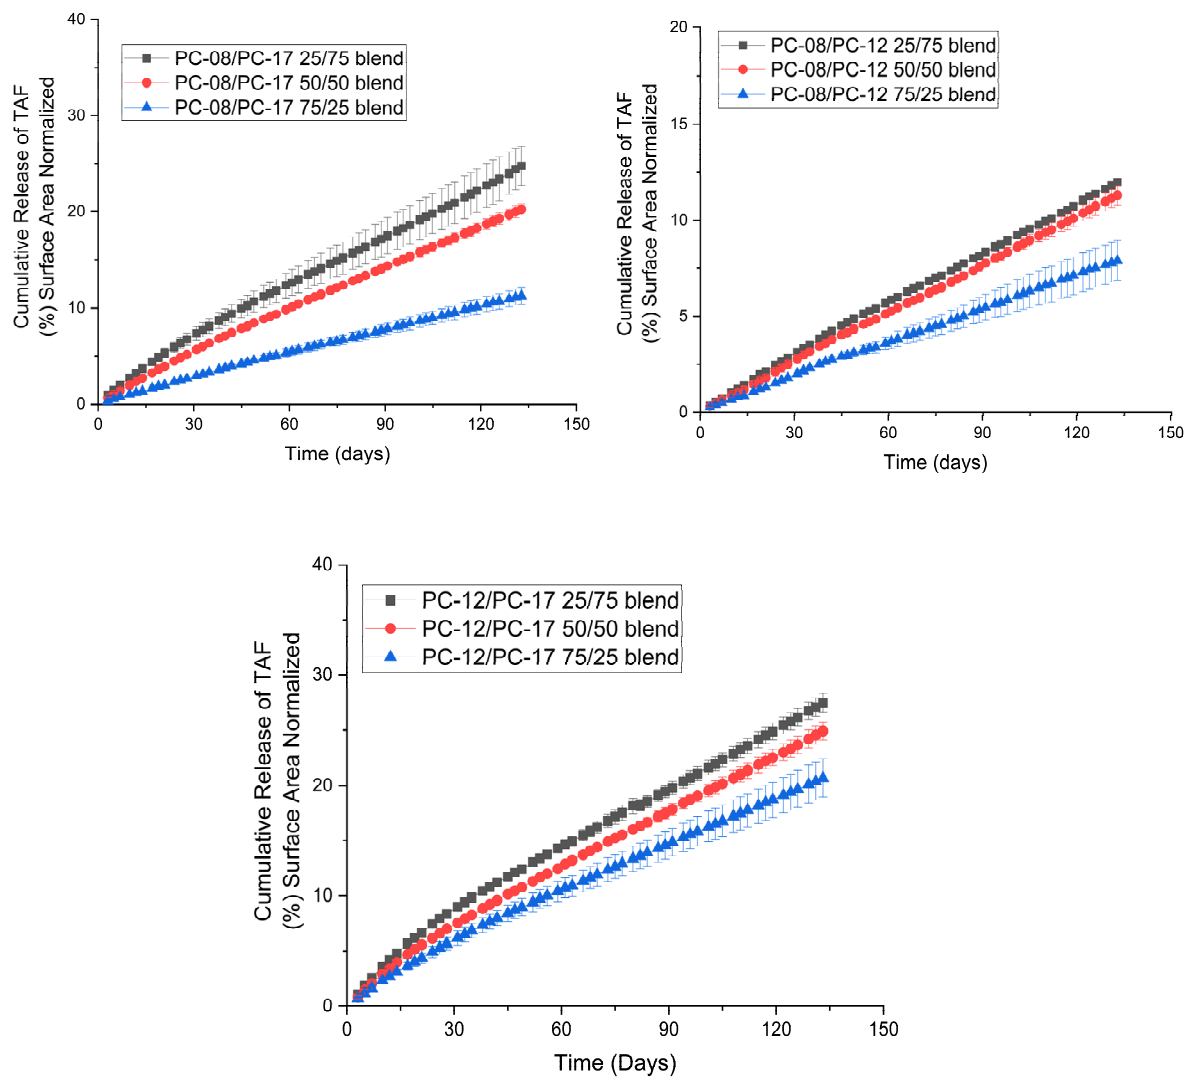

**Figure S10.** Percentage Cumulative release profiles of TAF from implants comprising extruded tubes of PCL MW blends. All implants contain a formulation of 2:1 TAF/ sesame oil and tubes with a wall thickness of 100  $\mu\text{m}$ , a length of 40 mm, and an OD of 2.5 mm. All samples were performed in triplicate.
